# Supplementary material for: Sonochemistry-assisted synthesis and optical properties of mesoporous ZnS nanomaterials
Source: Royal Society of Chemistry journal article supplement (doi:10.1039/c3ta13636a), 2013-10-29
Supplement: c3ta13636a.pdf [file c3ta13636a.pdf]

## Supporting Information:

### Sonochemistry-assisted synthesis and optical properties of mesoporous ZnS nanomaterials

Yun-Pei Zhu,<sup>a,#</sup> Jie Li,<sup>a,#</sup> Tian-Yi Ma,<sup>a</sup> Yu-Ping Liu,<sup>b</sup> Gaohui Du<sup>c</sup> and Zhong-Yong Yuan<sup>\*a</sup>

<sup>a</sup> Key Laboratory of Advanced Energy Materials Chemistry (Ministry of Education), Synergetic Innovation Center of Chemical Science and Engineering (Tianjin), College of Chemistry, Nankai University, Tianjin 300071, China. Fax: +86 22 23502604; Tel: +86 22 23509610; E-mail: zyyuan@nankai.edu.cn

<sup>b</sup> Research Center for Analytical Sciences, College of Chemistry, Nankai University, Tianjin 300071, China

<sup>c</sup> Institute of Physical Chemistry, Zhejiang Normal University, Jinhua 321004, China

<sup>#</sup> These authors have made equal contributions to this work.

**Table S1** Summary of the physicochemical properties and photodegradation rate constant of the synthesized s-ZnS materials in ethanol system after various duration of ultrasonic irradiation.

| Ultrasonic time /min | Crystallite size /nm | $S_{\text{BET}}/\text{cm}^2 \text{g}^{-1}$ | $V_{\text{pore}}/\text{cm}^3 \text{g}^{-1}$ | $D_{\text{DFT}}/\text{nm}$ | $k/\text{min}^{-1}$ |
|----------------------|----------------------|--------------------------------------------|---------------------------------------------|----------------------------|---------------------|
| 0 min                | 7.2                  | 160                                        | 0.42                                        | 4.9                        | 0.0138              |
| 1 min                | 5.9                  | 197                                        | 0.41                                        | 3.6                        | 0.0154              |
| 3 min                | 4.5                  | 226                                        | 0.36                                        | 5.9                        | 0.0188              |
| 5 min                | 3.8                  | 263                                        | 0.31                                        | 5.1                        | 0.0245              |
| 20 min               | 3.8                  | 258                                        | 0.32                                        | 5.1                        | 0.0242              |

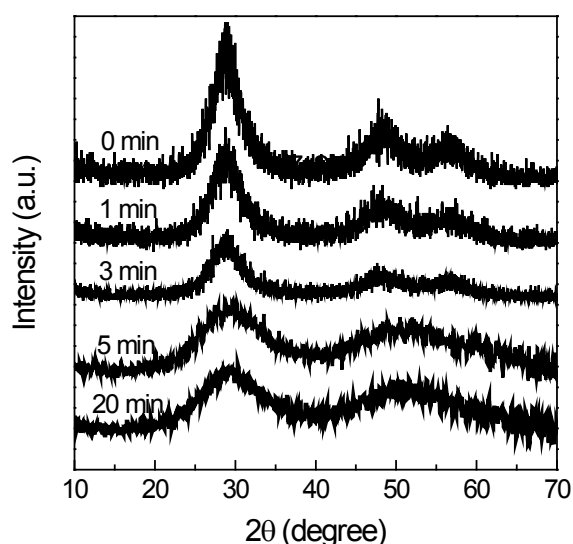

**Fig. S1** XRD patterns of the ZnS nanomaterials synthesized in the ethanol solutions with the different ultrasonic irradiation time.

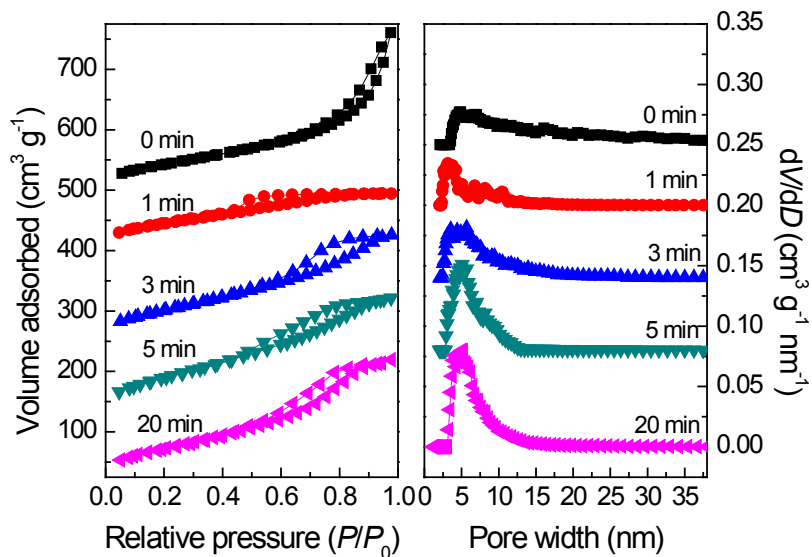

**Fig. S2**  $N_2$  sorption isotherms (left) and the corresponding pore size distribution curves (right) of the s-ZnS nanomaterials synthesized in the ethanol solutions with the different ultrasonic irradiation time. The volume adsorbed was shifted by 500, 380, 240 and 120, and  $dV/dD$  value was shifted by 0.25, 0.20, 0.14, and 0.08 for the curves of the s-ZnS samples after 0, 1, 3, 5 and 20 min ultrasonic treatment, respectively.

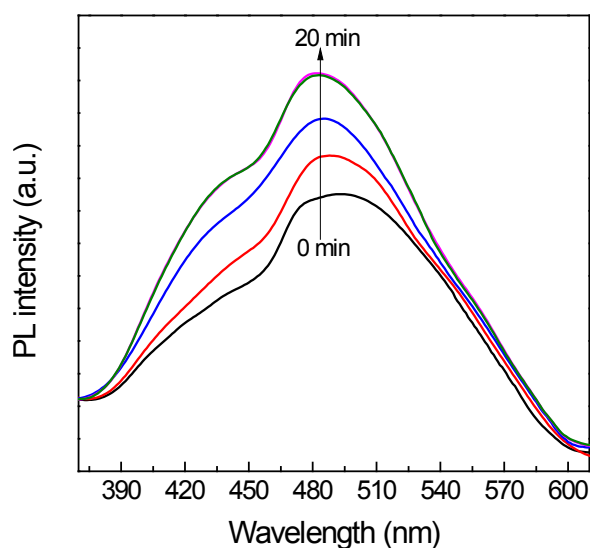

**Fig. S3** Time-dependent PL emission spectra of the ZnS materials synthesized in ethanol system with the different ultrasonic irradiation time (0, 1, 3, 5, 20 min), showing ultrasonic-time-dependent increase of emission intensity.

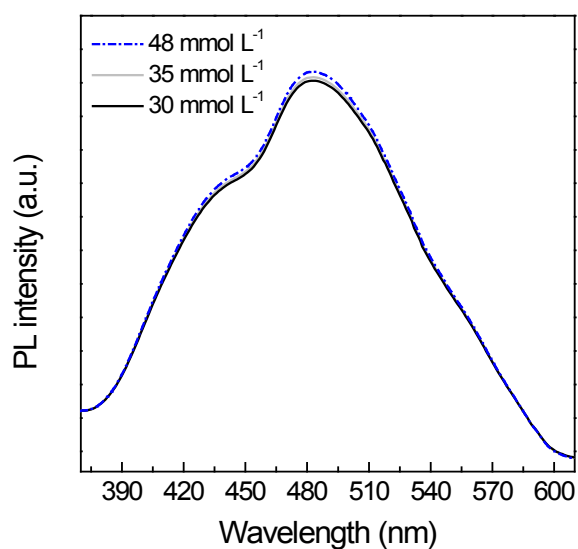

**Fig. S4** PL emission spectra of the ZnS materials synthesized in the ethanol after 5 min sonication. Initial solution volume and concentration:  $\text{Zn}(\text{NO}_3)_2$  (30 ml): 30, 35 and  $48 \text{ mmol L}^{-1}$ ,  $\text{Na}_2\text{S}$  (30ml):  $30 \text{ mmol L}^{-1}$ .

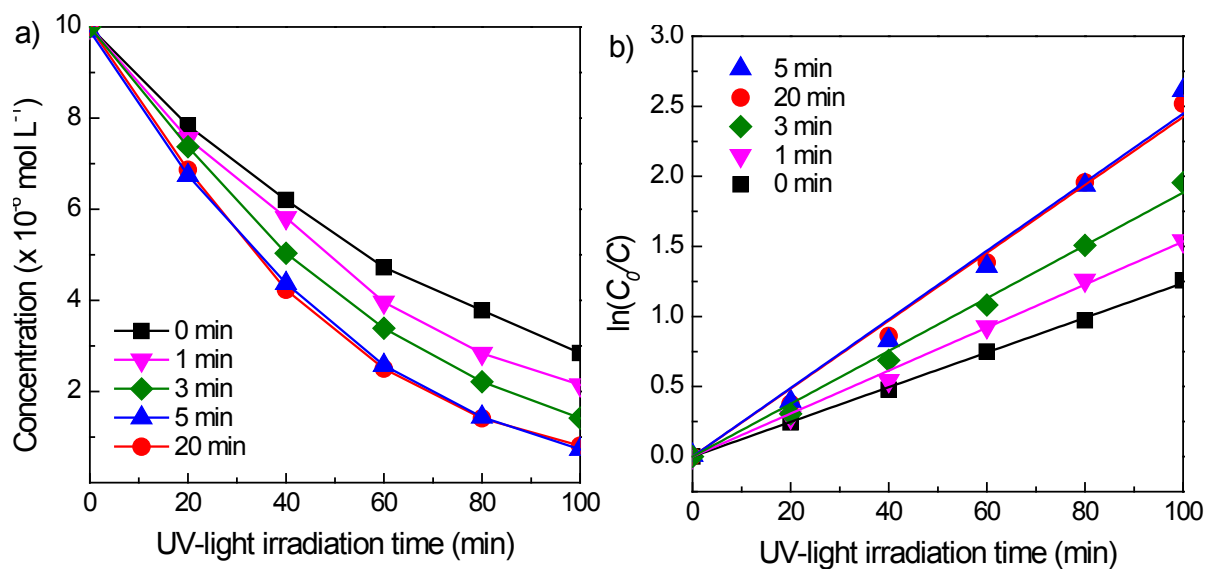

Fig. S5 (a) Photoactivities of the ZnS materials synthesized in ethanol system with the different ultrasonic irradiation time for RhB degradation under UV-light irradiation. (b) Plots of  $\ln(C_0/C)$  versus the irradiation time, showing the fitting results using the pseudo-first-order reaction.
